# Supplementary material
Source: PubMed Central journal article supplement (PMC2981659)

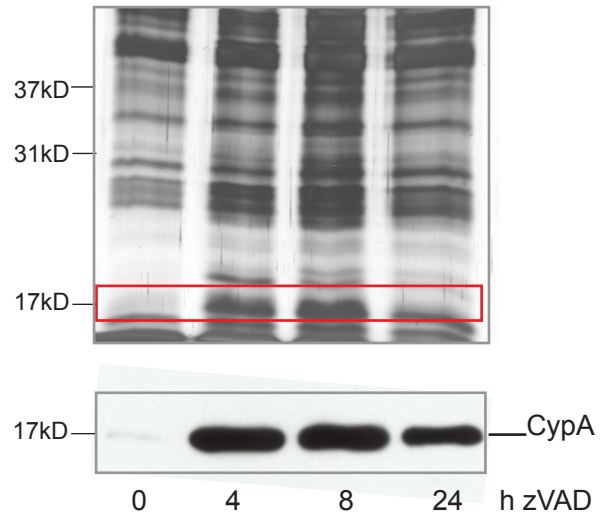

Supplement: NIHMS233781-supplement-1.pdf [file NIHMS233781-supplement-1.pdf]

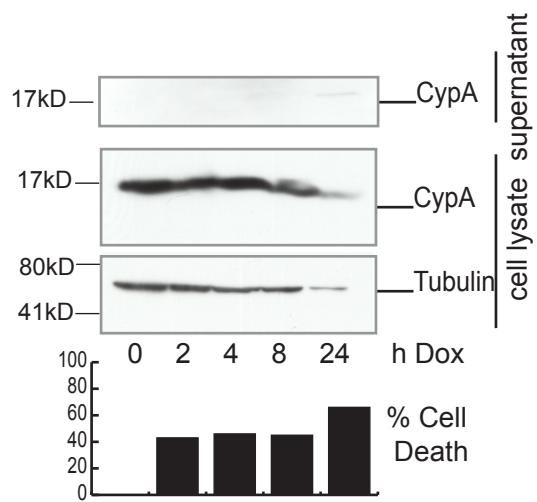

Supplement: NIHMS233781-supplement-2.pdf [file NIHMS233781-supplement-2.pdf]

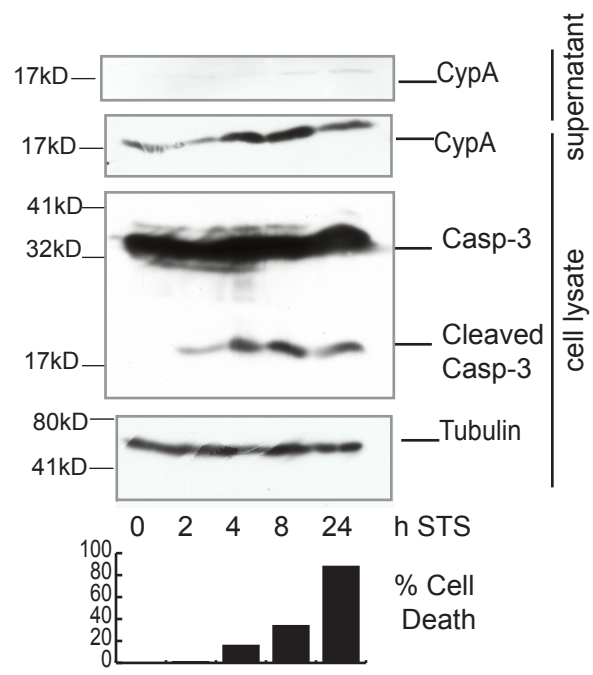

Supplement: NIHMS233781-supplement-3.pdf [file NIHMS233781-supplement-3.pdf]

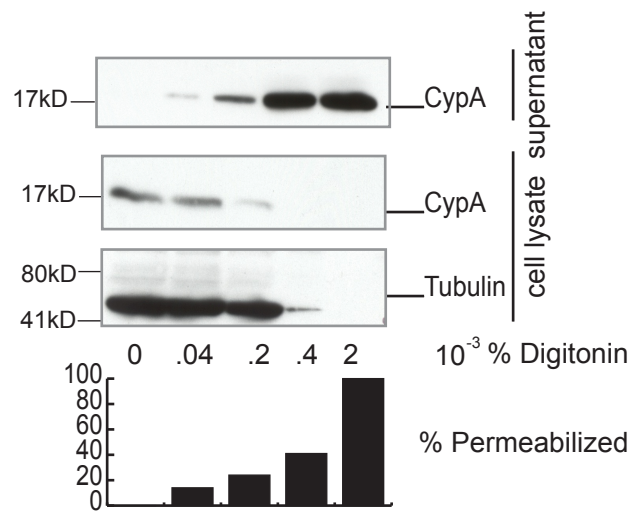

Supplement: NIHMS233781-supplement-4.pdf [file NIHMS233781-supplement-4.pdf]
